# Supplementary material for: Ion etching modulates the synthesis of CoNiCU sulfide for high-performance supercapacitors
Source: Royal Society of Chemistry journal article supplement (doi:10.1039/d3se01425h), 2024-01-01
Supplement: d3se01425h1.pdf [file d3se01425h1.pdf]

## Supporting information

### Chemicals and reagents

Cobalt nitrate hexahydrate ( $\text{Co}(\text{NO}_3)_2 \cdot 6\text{H}_2\text{O}$ ,  $\geq 99.0\%$ ), Copper nitrate hexahydrate ( $\text{Cu}(\text{NO}_3)_2 \cdot 6\text{H}_2\text{O}$ ,  $\geq 99.0\%$ ), nickel nitrate hexahydrate ( $\text{Ni}(\text{NO}_3)_2 \cdot 6\text{H}_2\text{O}$ ,  $\geq 99.0\%$ ), thioacetamide (TAA,  $\text{C}_2\text{H}_5\text{NS}$ ,  $\geq 99.0\%$ ) and trimesic acid (BTC,  $\text{C}_9\text{H}_6\text{O}_6$ ,  $\geq 98.0\%$ ) were purchased from Aladdinlk. Polyvinylalcohol ( $[\text{C}_2\text{H}_4\text{O}]_n$ ) was purchased from Sinopharm. N, N-Dimethylformamide (DMF, analytical grade), absolute ethanol ( $\text{C}_2\text{H}_6\text{O}$ ,  $\geq 95.0\%$ ), hydroxide (KOH,  $\geq 99.0\%$ ), polyvinyl pyrrolidone (PVP, K-30) were purchased from Kermel. Activated carbon (AC,  $968.16\text{ m}^2\text{ g}^{-1}$ ), Carbon cloth, and nickel foam (NF) were obtained from Keliyuan. Deionized water was used for the entire process. Each reagent was of analytical grade and used directly.

### Synthesis of flexible wearable electrodes

The carbon cloth (1x4 cm) was cleaned with acetone solution for 10 minutes, and soaked in 3mol/L hydrochloric acid for 30 minutes. Afterwards, the sample was washed multiple times with ethanol and water, and then subjected to vacuum drying at a temperature of  $60\text{ }^\circ\text{C}$  for a duration of 12 hours.

To prepare PVA/KOH gel, 2 g PVA was added to 30 ml water and heated at  $100\text{ }^\circ\text{C}$  for 1 hour until fully dissolved. Natural cooling was followed by adding and stirring 15 mL 6 mol/L KOH and placed in a petri dish to cool overnight.

The resulting slurry from the working electrode preparation method was applied onto the treated carbon cloth, while PVA/KOH gel was the diaphragm and then wrapped with insulating tape.

### Preparation of the working electrode

The obtained sample was used as electrode material and prepared into a slurry with acetylene black and Nafion solution (wt 5 %) according to the mass ratio of 8:1:1. As a binder, Nafion solution was utilized while Acetylene black served as a conductive agent. After application to the nickel foam, the paste was weighed to 1.25 mg. Nickel foam was dried under vacuum at 60 °C for 6 h, and then pressed under 8 Mpa pressure for 3 min to yield the working elect Co-Ni-Cu/S rode.

### Electrochemical calculation formula

The specific capacitance ( $C$ , F g<sup>-1</sup>) was calculated from the discharge curves using the following equation.

$$C = \frac{2i_m \int V dt}{V_1^2 - V_0^2} \quad (S1)$$

the specific capacitance  $Q_s$  (C g<sup>-1</sup>) was calculated from the discharge curves using the following equation.

$$Q_s = C \times \Delta V \quad (S2)$$

The energy density ( $E$ , Wh kg<sup>-1</sup>) and power density ( $P$ , W kg<sup>-1</sup>) against two electrodes in the device were calculated using the following equations.

$$E = \frac{1/2 C (\Delta V)^2}{3.6} \quad (S3)$$

$$P = \frac{E \times 3600}{\Delta t} \quad (S4)$$

The capacitance contribution and diffusion control contribution of the charge storage process are according to the following equation.

$$i(v) = k_1 v + k_2 v^{1/2} \quad (S5)$$

Where  $i(v)$  is the peak current at a specific voltage,  $k_1$  and  $k_2$  represent constants, and  $v$  represents the scan rate.

The contribution of surface and diffusion energy storage processes to charge storage is according to the following equation.

$$i = av^b \quad (S6)$$

$$\log(i) = b \log(v) + \log\left(\frac{f_0}{v_0}\right)(a) \quad (S7)$$

## Supplementary figures

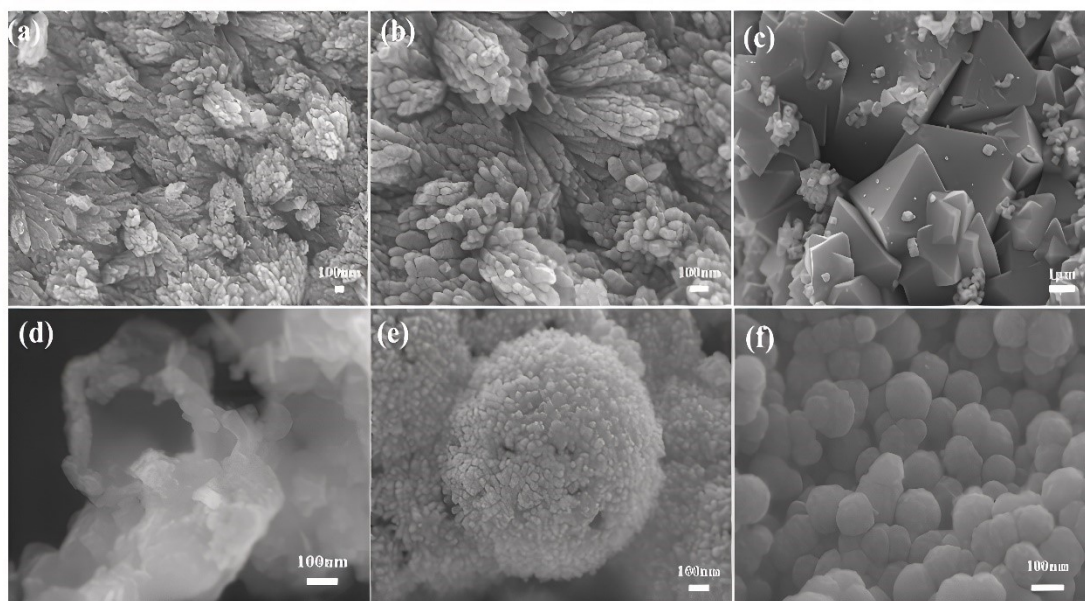

**Fig. S1 .** (a, b) SEM images of Co-Ni/BTC, (c) SEM images of Co-Ni-Cu/OH, (d, e, f) Co-Ni-Cu/S, Co-Ni-Mn/S, and Co-Ni-Fe-S, respectively.

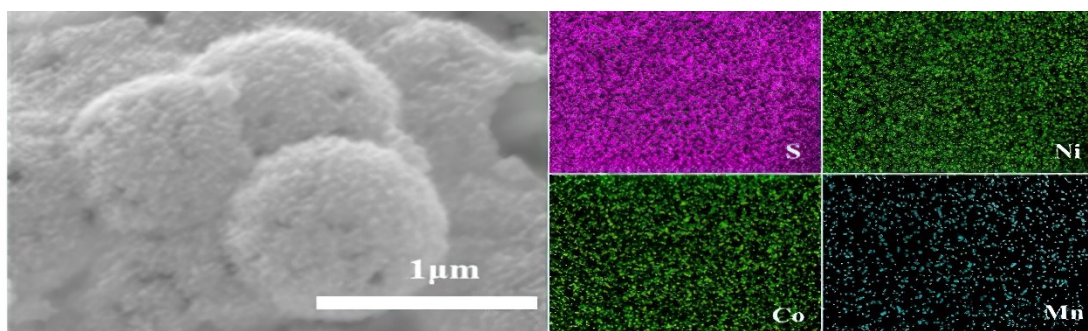

**Fig. S2.** FESEM image and corresponding EDS elemental mapping of Co-Ni-Mn/S.

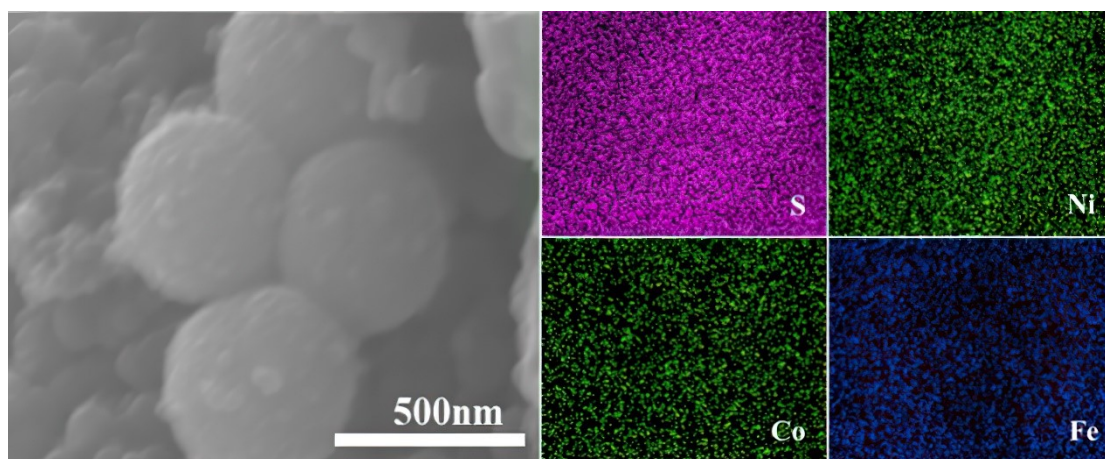

**Fig. S3** . FESEM image and corresponding EDS elemental mapping of Co-Ni-Fe/S.

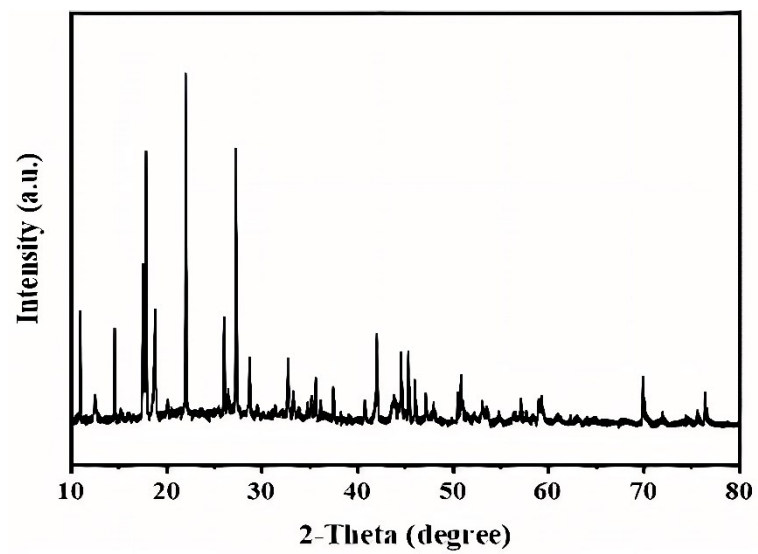

**Fig. S4 .** XRD patterns of Co-Ni/BTC.

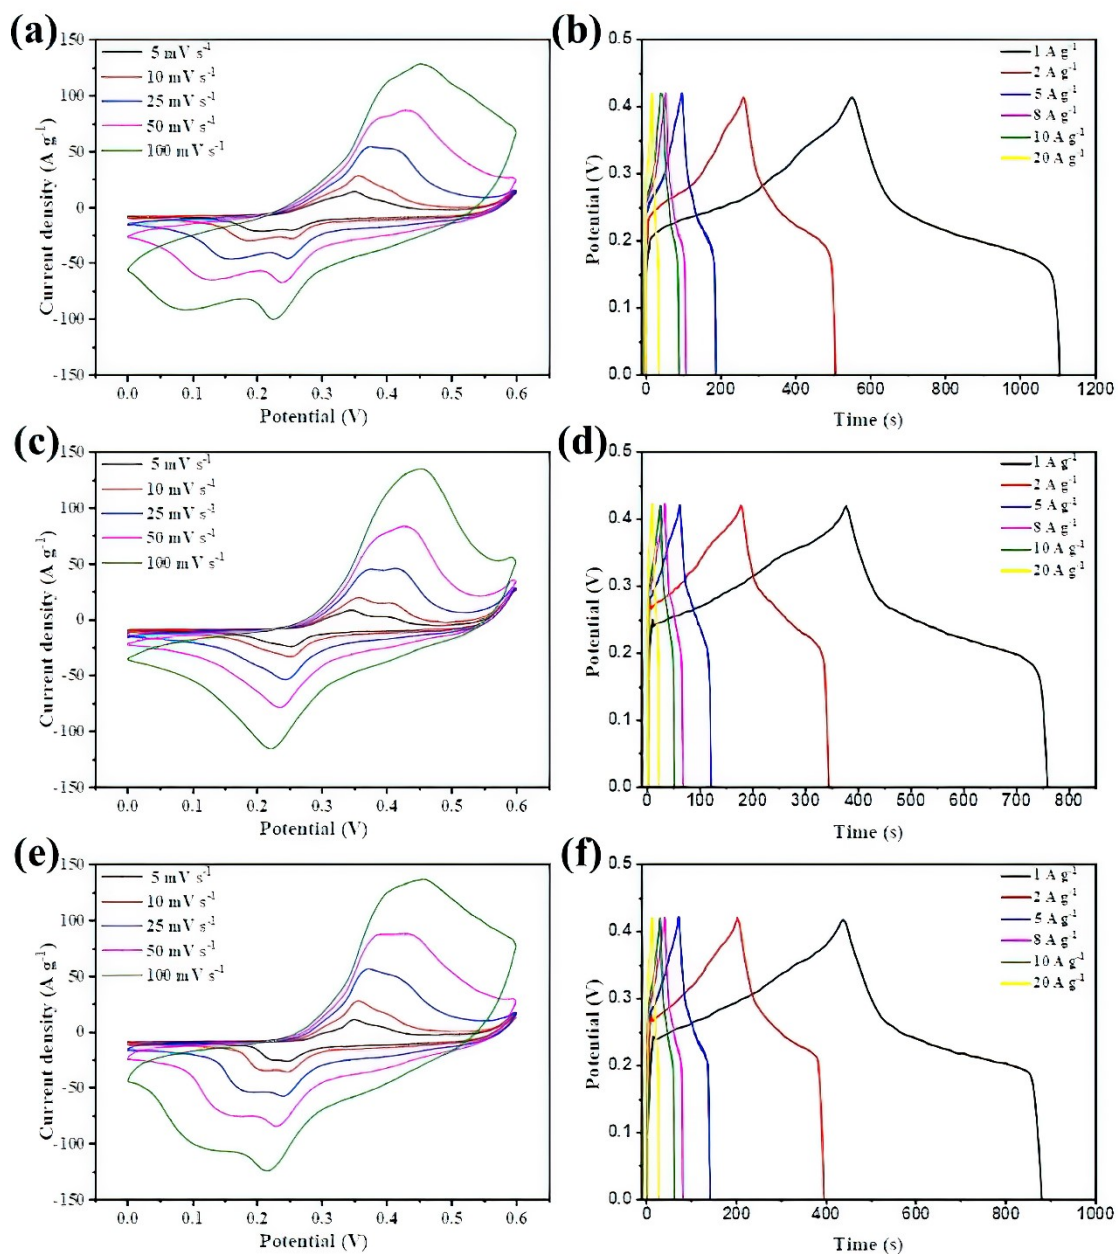

**Fig. S5.** (a, c, e) CV curves at various scan rates and (b, d, f) GCD curves at various densities of Co-Ni/BTC, Co-Ni-Cu/OH, and Co-Ni-Mn/OH, respectively.

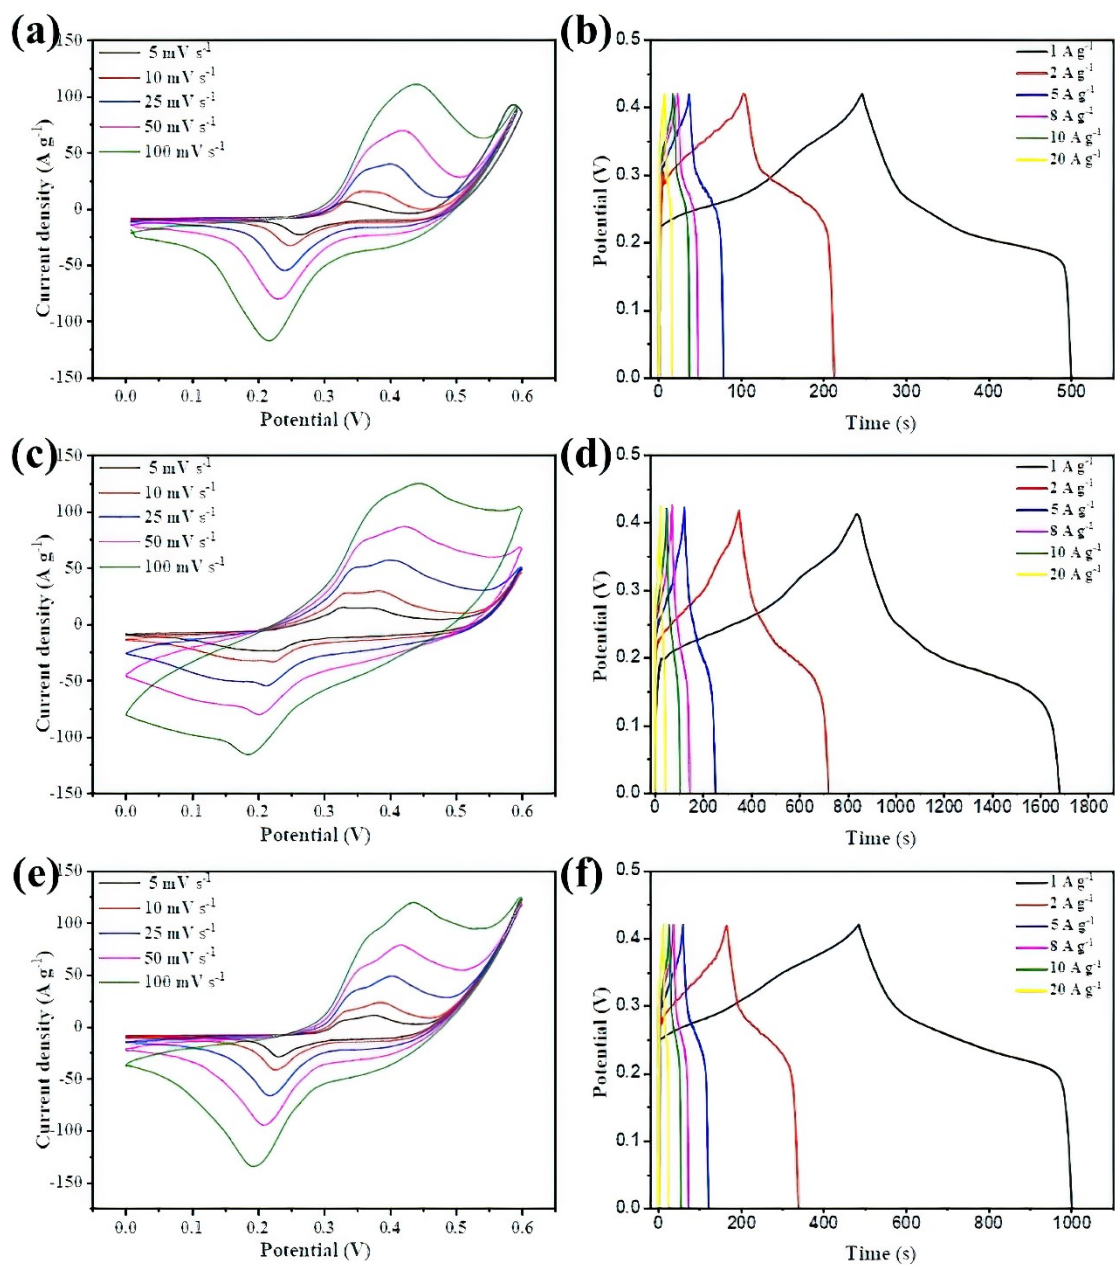

**Fig. S6.** (a, c, e) CV curves at various scan rates and (b, d, f) GCD curves at various densities of Co-Ni-Fe/OH, Co-Ni-Mn/S, and Co-Ni-Fe/S.

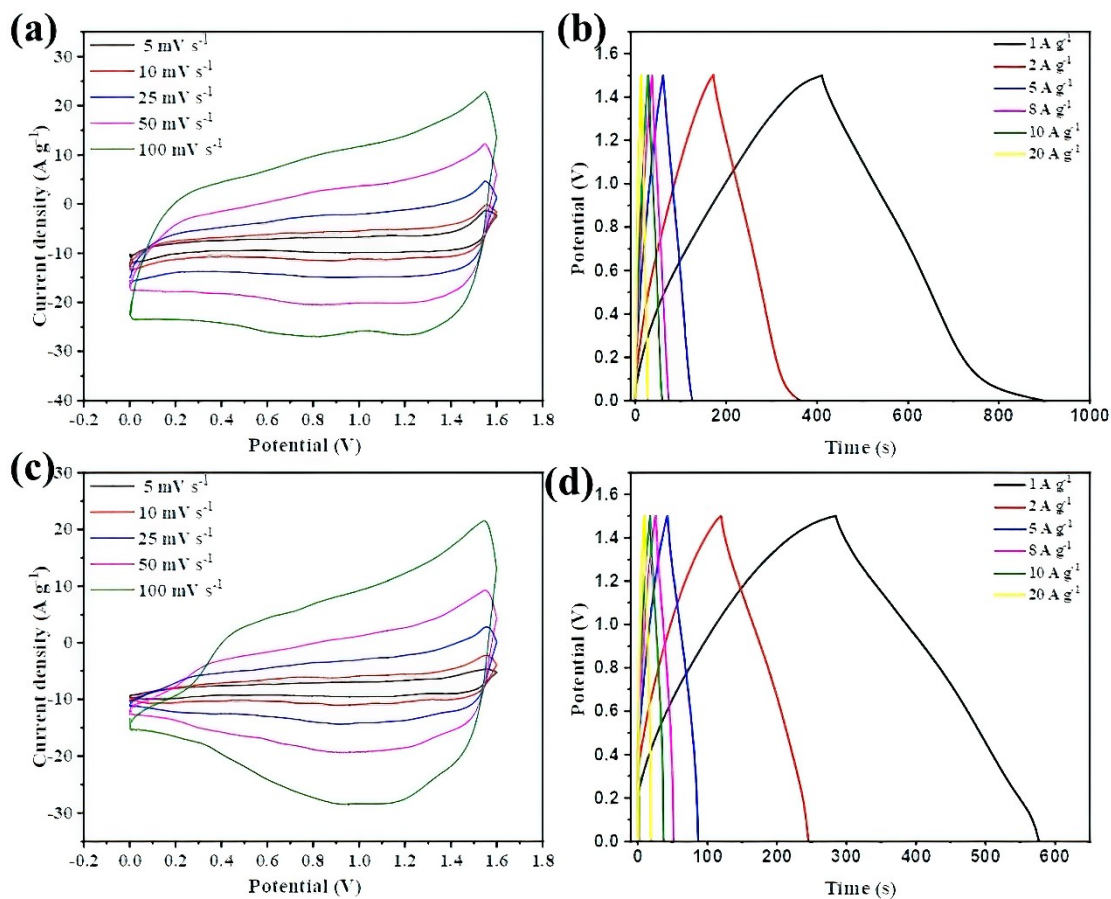

**Fig. S7.** (a, c) CV curves at various scan rates and (b, d) GCD curves at various densities of Co-Ni-Mn/S//AC and Co-Ni-Fe/S//AC ASC devices.

Supplementary Table 1. Metal contents in different samples determined by ICP-OES.

| NO. | Samples    | Element | Theoretical values (wt.%) | Measured values by ICP-OES (wt.%) |
|-----|------------|---------|---------------------------|-----------------------------------|
| 1   | Co-Ni-Cu/S | Co      | 1.00 %                    | 0.89 %                            |
|     |            | Ni      | 3.00 %                    | 2.76 %                            |
|     |            | Cu      | 1.00 %                    | 0.92 %                            |
| 2   | Co-Ni-Mn/S | Co      | 1.00 %                    | 0.92 %                            |
|     |            | Ni      | 3.00 %                    | 2.88 %                            |
|     |            | Fe      | 1.00 %                    | 0.74 %                            |
| 3   | Co-Ni-Fe/S | Co      | 1.00 %                    | 0.94 %                            |
|     |            | Ni      | 3.00 %                    | 2.79 %                            |
|     |            | Mn      | 1.00 %                    | 0.83 %                            |
